# Supplementary material for: Insights into water extraction and aggregation mechanisms of malonamide-alkane mixtures
Source: Royal Society of Chemistry journal article supplement (doi:10.1039/d4cp01369g), 2024-01-01
Supplement: d4cp01369g1.pdf [file d4cp01369g1.pdf]

# Supporting Information for: Insights into Water Extraction and Aggregation Mechanisms of Malonamide-Alkane Mixtures

Brittany L. Bonnett,<sup>\*,†,§</sup> Tasnim Rahman,<sup>†</sup> Derrick Poe,<sup>†</sup> Soenke Seifert,<sup>‡</sup> G.  
Brian Stephenson,<sup>\*,¶</sup> and Michael J. Servis<sup>\*,†</sup>

<sup>†</sup>*Chemical Sciences and Engineering Division, Argonne National Laboratory, Lemont, IL  
60439, USA*

<sup>‡</sup>*X-ray Science Division, Argonne National Laboratory, Lemont, IL 60439, USA*

<sup>¶</sup>*Materials Science Division, Argonne National Laboratory, Lemont, IL 60439, USA*

<sup>§</sup>*Current address: Electra, Boulder, CO 80301, USA*

E-mail: bbonnett@anl.gov; gbs@anl.gov; mservis@anl.gov

# Fitting of SAXS patterns

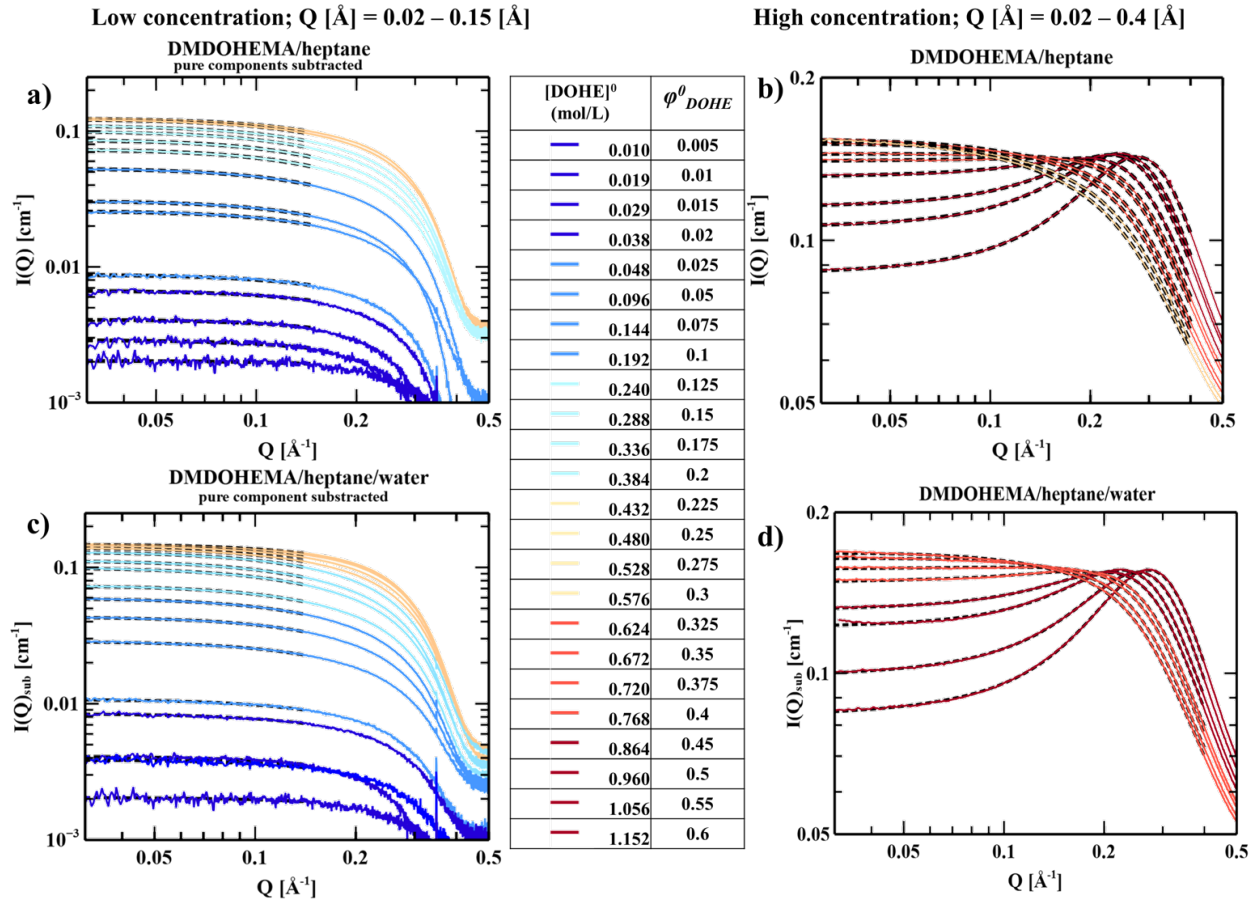

Figure S.1: SAXS fitting of DOHE in C7 without water contact a) at low concentration of DOHE with background subtracted b) at high concentration of DOHE without background subtracted; with water contact c) at low concentration of DOHE with background subtracted d) at high concentration of DOHE without background subtracted.

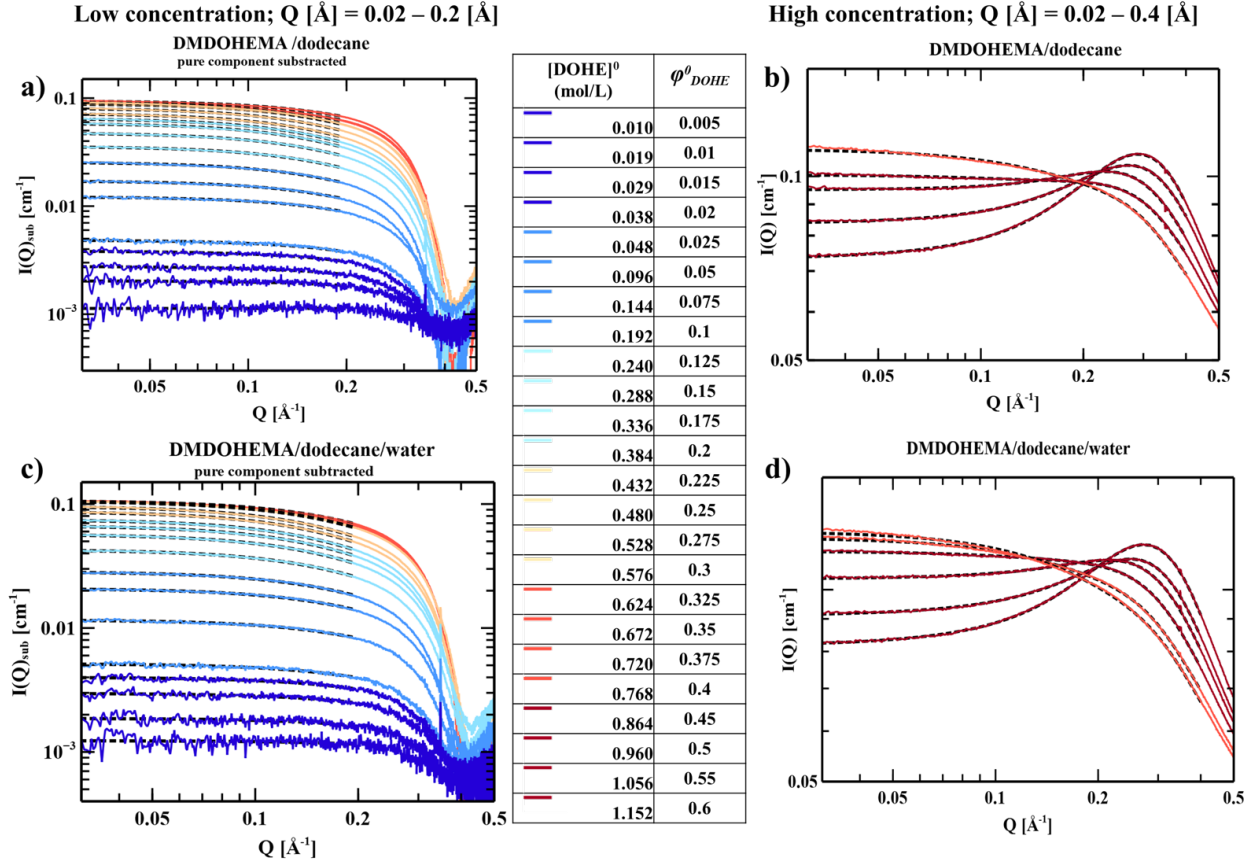

Figure S.2: SAXS fitting of DOHE in C12 without water contact a) at low concentration of DOHE with background subtracted b) at high concentration of DOHE without background subtracted; with water contact c) at low concentration of DOHE with background subtracted d) at high concentration of DOHE without background subtracted.

# Composition of Maximum in Scattering

The maxima in  $I_{OZ}$  are fit to polynomials with the form

$$I_{OZ} = \sum_i a_i (\varphi_E - b_i)^{2i} \quad (\text{S.1})$$

using  $i = 1, 2$ .

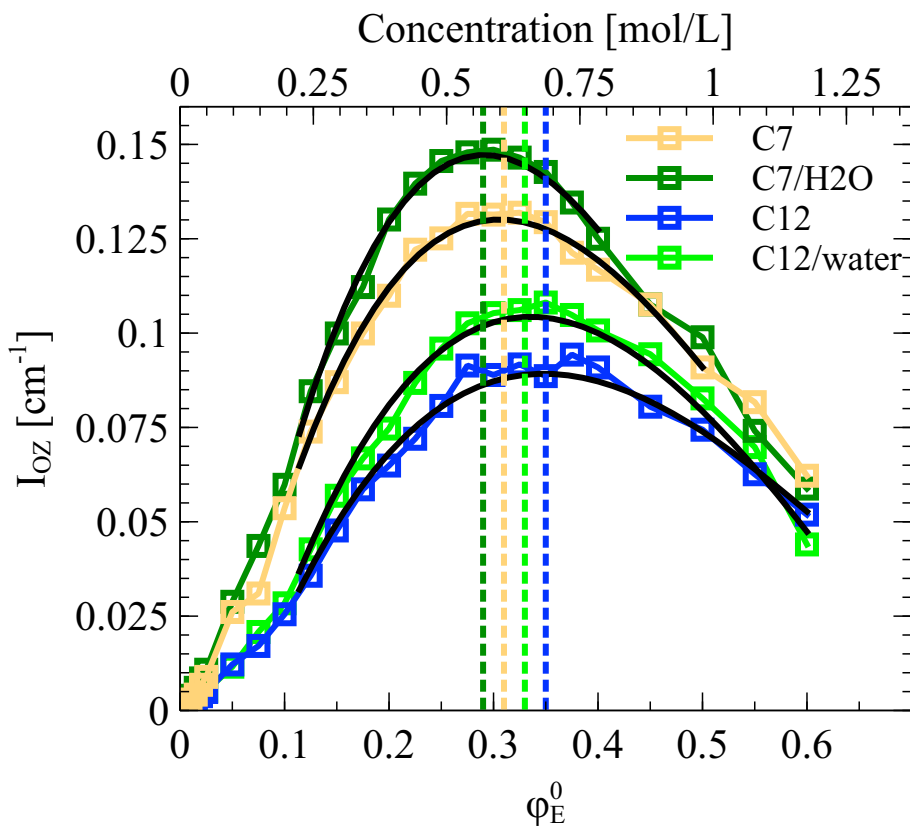

Figure S.3: Polynomial fits to estimate the composition of the maximum in scattering intensity,  $I_{OZ}$ , for each system: DMDOHEMA/C12 (blue), DMDOHEMA/C12/water (green), DMDOHEMA/C7 (black), and DMDOHEMA/C7/water (red). Fits are shown with orange lines, and vertical lines denote the maximum value for each particular system of the corresponding color. Composition values are given in Table 3.

## KF measurements of DMDOHEMA in 3 M LiNO<sub>3</sub>

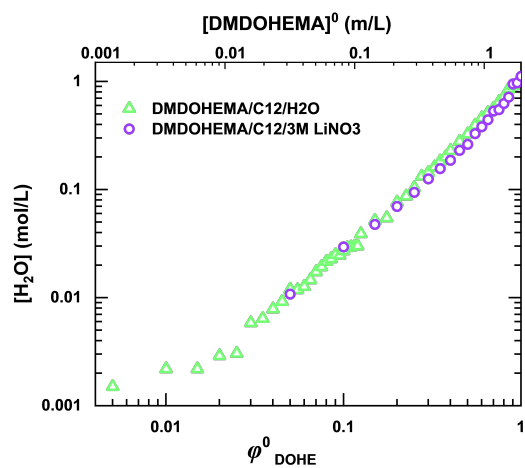

Figure S.4: Organic phase water concentration,  $[\text{H}_2\text{O}]$ , upon extraction into DMDOHEMA/dodecane mixtures as a function of initial DMDOHEMA concentration,  $[\text{DOHE}]^0$  for pure water and 3 M LiNO<sub>3</sub> aqueous phases.

# Molecular Dynamics

Table S.1: MD simulation compositions and periodic cubic box sizes. Concentrations are given in mol/L.

| $\varphi_{ext}^0$ | DOHE  |      | Water |      | <i>n</i> -Dodecane<br>num. | Simulation box<br>length (Å) |
|-------------------|-------|------|-------|------|----------------------------|------------------------------|
|                   | conc. | num. | conc. | num. |                            |                              |
| 0.26              | 0.5   | 301  | 0.11  | 66   | 1961                       | 99.07                        |
| 0.51              | 1.0   | 590  | 0.33  | 199  | 1298                       | 99.56                        |

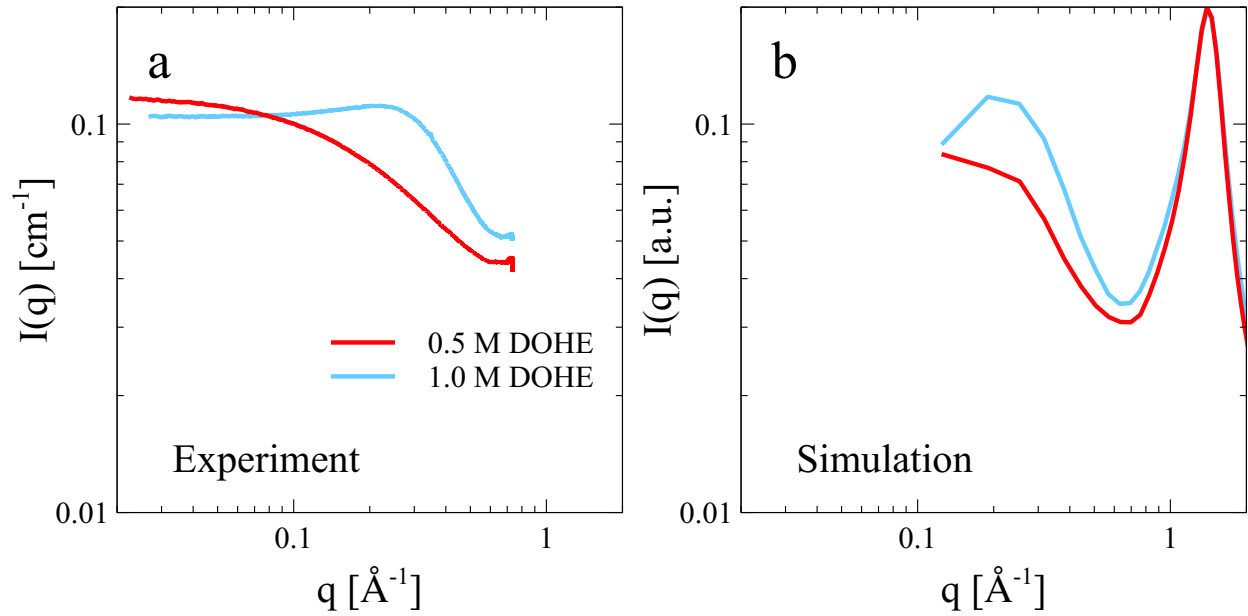

Figure S.5: Experimental SAXS patterns for water-contacted 0.49 and 0.98 M DMDOHEMA in dodecane (left) are compared to the simulation-calculated SAXS patterns for 0.5 and 1.0 M DMDOHEMA in dodecane with extracted water (right).

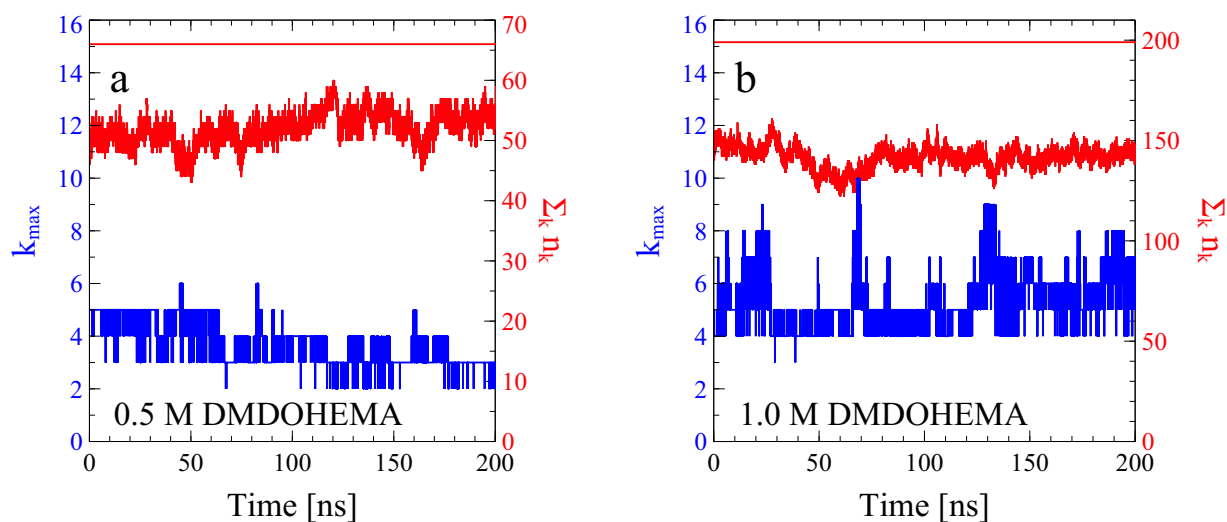

Figure S.6: The size of the single largest water cluster ( $k_{max}$ ) is shown on the blue left axis and the total number of clusters of all sizes ( $\sum_k n_k$ ) is shown on the red right axis as a function of simulation time. For reference, the total number of water molecules is shown on the red axis at a solid red line. Data for 0.5 M DMDOHEMA in dodecane is shown in panel A, and data for 1.0 M DMDOHEMA is shown in panel B.
